# Supplementary material for: Integrative analysis of transcriptomics and clinical data uncovers the tumor-suppressive activity of MITF in prostate cancer
Source: PubMed Central journal article supplement (PMC6181952; doi:10.1038/s41419-018-1096-6), 2018-10-11

A

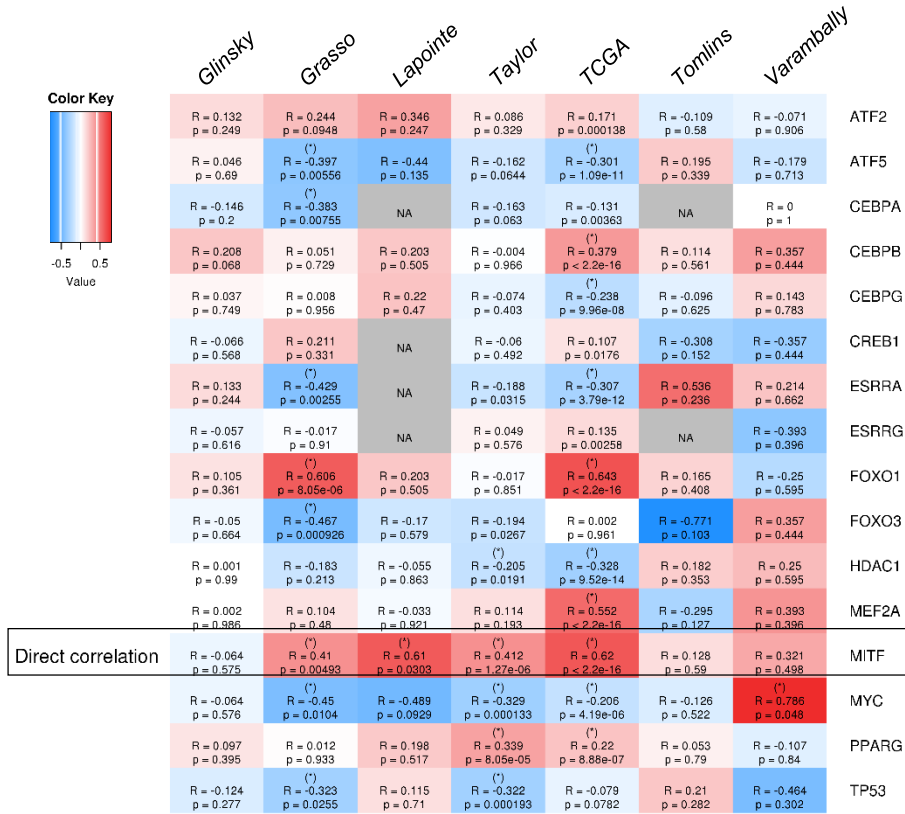

B

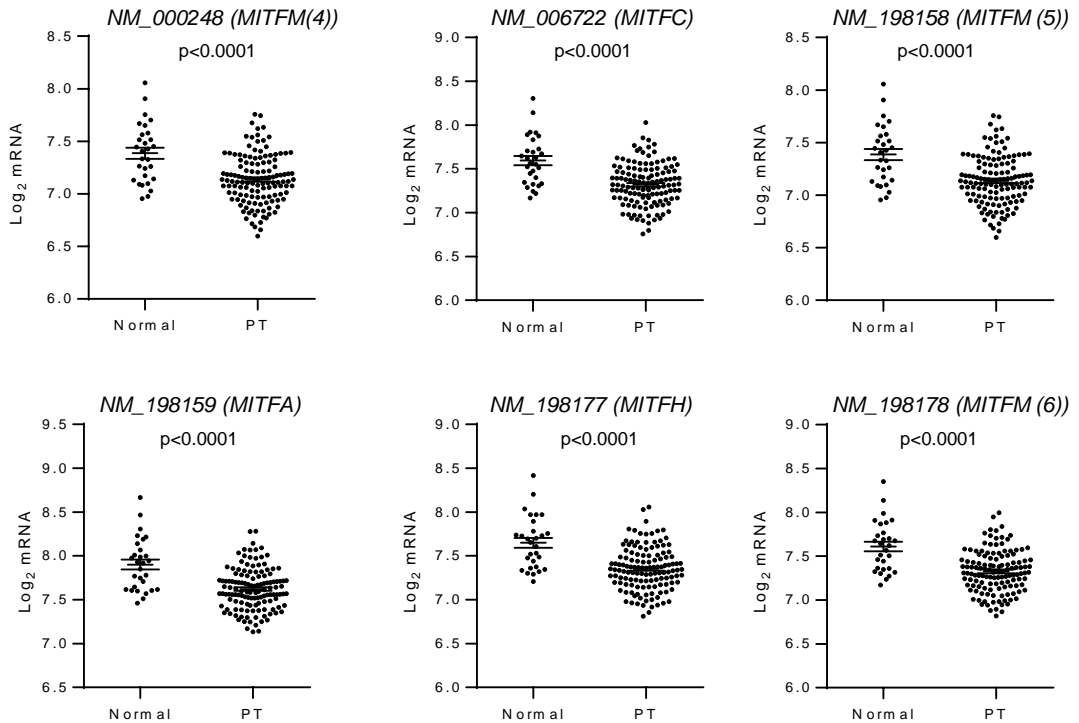

Supplement: 41419_2018_1096_MOESM2_ESM.pdf [file 41419_2018_1096_MOESM2_ESM.pdf]
