# Supplementary material for: Integrative analysis of transcriptomics and clinical data uncovers the tumor-suppressive activity of MITF in prostate cancer
Source: PubMed Central journal article supplement (PMC6181952; doi:10.1038/s41419-018-1096-6), 2018-10-11
Supplement: 41419_2018_1096_MOESM8_ESM.pdf [file 41419_2018_1096_MOESM8_ESM.pdf]

| regul | ProbelD              | SYMBOL      | Acc_No | FoldChange | LogRatio   | PValue     | AdjPValue | mean_g2  | mean_g1    | Probe_Seque                                                                                                                                                                                                                       | Gene_descr |
|-------|----------------------|-------------|--------|------------|------------|------------|-----------|----------|------------|-----------------------------------------------------------------------------------------------------------------------------------------------------------------------------------------------------------------------------------|------------|
| UU    | ILMN_180831TM45F19   | XM_0011342  | 2.3615 | 1.2397     | 6,48E-16   | 1.25E-11   | 10.52989  | 9.29019  | GCCCTCTGT  | PREDICTED: Homo sapiens transmembrane 4 L six family member 19, transcript variant 2 (TM45F19), mRNA.                                                                                                                             |            |
| UU    | ILMN_241361TM45F19   | NM_138461.1 | 2.2628 | 1.1791     | 5,34E-15   | 5.16E-11   | 11.21134  | 10.03325 | GCCCTCTGT  | Homo sapiens transmembrane 4 L six family member 19 (TM45F19), mRNA.                                                                                                                                                              |            |
| UU    | ILMN_172921CRYAB     | NM_001855.1 | 2.1445 | 1.1007     | 5,58E-12   | 2,93E-08   | 6,64361   | 7,54295  | GTCCTCACTG | Homo sapiens crystallin, alpha B (CRYAB), mRNA.                                                                                                                                                                                   |            |
| U     | ILMN_218881GDF15     | NM_004864.1 | 1.6255 | 0.7009     | 1,93E-10   | 5,32E-07   | 10,09842  | 9,39757  | CCGGGGTGT  | Homo sapiens growth differentiation factor 15 (GDF15), mRNA.                                                                                                                                                                      |            |
| U     | ILMN_181371KIAA1199  | NM_018689.1 | 1.5868 | 0.6661     | 6,06E-12   | 2,93E-08   | 9,29091   | 8,62483  | GCAAGCTCC  | Homo sapiens KIAA1199 (KIAA1199), mRNA.                                                                                                                                                                                           |            |
| U     | ILMN_172121KRT75     | NM_004693.1 | 1.5376 | 0.6207     | 1,09E-10   | 4,22E-07   | 8,01681   | 7,39616  | CTATACCAT  | Homo sapiens keratin 75 (KRT75), mRNA.                                                                                                                                                                                            |            |
| U     | ILMN_179821UPP1      | NM_003364.1 | 1.5096 | 0.5942     | 5,09E-10   | 1,23E-06   | 9,25338   | 8,66222  | ATCAGGAAG  | Homo sapiens uridine phosphorylase 1 (UPP1), transcript variant 1, mRNA.                                                                                                                                                          |            |
| U     | ILMN_225141UBC       | NM_031099.1 | 1.5066 | 0.5913     | 1,90E-10   | 5,23E-07   | 7,05603   | 6,46676  | CCAGAGAGC  | Homo sapiens ubiquitin C (UBC), mRNA.                                                                                                                                                                                             |            |
| U     | ILMN_205871FI27      | NM_005532.1 | 1.4863 | 0.5717     | 7,85E-05   | 0,0240809  | 8,21818   | 7,64646  | CCAAGTTCAT | Homo sapiens interferon, alpha-inducible protein 27 (IFI27), transcript variant 2, mRNA.                                                                                                                                          |            |
| U     | ILMN_180121GPNMB     | NM_0010053  | 1.4264 | 0.5124     | 1,62E-08   | 2,85E-05   | 6,99818   | 6,4858   | CAATAACA   | Homo sapiens glycoprotein (transmembrane) nmb (GPNMB), transcript variant 1, mRNA.                                                                                                                                                |            |
| U     | ILMN_205231MYOC      | NM_000261.1 | 1.4037 | 0.4892     | 1,84E-09   | 3,95E-06   | 7,18173   | 6,69255  | TTCCTGGGT  | Homo sapiens myocilin, trabecular meshwork inducible glucocorticoid response (MYOC), mRNA.                                                                                                                                        |            |
| U     | ILMN_165711C14orf78  | XM_0011324  | 1.3797 | 0.4643     | 5,34E-08   | 8,61E-05   | 9,07439   | 8,61007  | CACACTGTC  | PREDICTED: Homo sapiens chromosome 14 open reading frame 78 (C14orf78), mRNA.                                                                                                                                                     |            |
| U     | ILMN_170081C3orf59   | NM_174967.1 | 1.3607 | 0.4444     | 9,70E-09   | 1,88E-05   | 11,08157  | 10,6372  | TTCGGTGGC  | Homo sapiens chromosome 3 open reading frame 59 (C3orf59), mRNA.                                                                                                                                                                  |            |
| U     | ILMN_175891RGS4      | NM_029513.1 | 1.3288 | 0.4101     | 3,15E-07   | 0,0040645  | 8,01647   | 7,60634  | CCTTCAAAAG | Homo sapiens regulator of G-protein signalling 4 (RGS4), mRNA.                                                                                                                                                                    |            |
| U     | ILMN_241231AKR1C2    | NM_001354.1 | 1.3283 | 0.4095     | 1,14E-07   | 0,00016973 | 7,08308   | 6,67355  | CTGCTGGC   | Homo sapiens aldo-keto reductase family 1, member C2 (dihydrodiol dehydrogenase 2), bile acid binding protein; 3-alpha hydroxysteroid dehydrogenase, type III (AKR1C2), transcript variant 1, mRNA. XM_943424_XM_943425_XM_943426 |            |
| U     | ILMN_171311AKR1C3    | NM_003739.1 | 1.308  | 0.3874     | 1,15E-05   | 0,00676418 | 8,33339   | 7,946    | GCCGGTGGC  | Homo sapiens aldo-keto reductase family 1, member C3 (3-alpha hydroxysteroid dehydrogenase, type II) (AKR1C3), mRNA.                                                                                                              |            |
| U     | ILMN_1319081CCL2     | NM_0011309  | 1.3013 | 0.3799     | 7,93E-07   | 0,00095875 | 7,58418   | 7,20423  | GCGATGCC   | Homo sapiens chemokine (C-C motif) receptor-like 2 (CCL2), transcript variant 2, mRNA.                                                                                                                                            |            |
| U     | ILMN_180991NDRG1     | NM_006096.1 | 1.2931 | 0.3708     | 3,74E-05   | 0,0141765  | 10,46289  | 10,09207 | CTTCCCTGC  | Homo sapiens N-myc downstream regulated gene 1 (NDRG1), mRNA.                                                                                                                                                                     |            |
| U     | ILMN_175111HIST1H4H  | NM_003543.1 | 1.2928 | 0.3705     | 5,80E-06   | 0,0039092  | 7,93402   | 7,56357  | GCCACTCTT  | Homo sapiens histone cluster 1, H4h (HIST1H4H), mRNA.                                                                                                                                                                             |            |
| U     | ILMN_132421HIST2H4AA | NM_0010408  | 1.2892 | 0.3665     | 3,02E-07   | 0,00040645 | 7,9738    | 7,60733  | TACATGGCT  | Homo sapiens histone cluster 2, H2aa4 (HIST2H4AA), mRNA.                                                                                                                                                                          |            |
| U     | ILMN_172131KRT6B     | NM_005555.1 | 1.2857 | 0.3626     | 2,65E-06   | 0,00216622 | 6,66868   | 6,30608  | CTCTGGAGT  | Homo sapiens keratin 68 (KRT68), mRNA.                                                                                                                                                                                            |            |
| U     | ILMN_132431AHNAK2    | NM_138420.1 | 1.2736 | 0.3489     | 5,69E-06   | 0,0039092  | 8,10297   | 7,75405  | TGGGTGGC   | Homo sapiens AHNAK nucleoprotein 2 (AHNAK2), mRNA.                                                                                                                                                                                |            |
| U     | ILMN_172451LY96      | NM_015364.1 | 1.2665 | 0.3409     | 1,28E-06   | 0,00137918 | 6,76727   | 6,42641  | TGGGAGCC   | Homo sapiens lymphocyte antigen 96 (LY96), mRNA.                                                                                                                                                                                  |            |
| U     | ILMN_175951RND3      | NM_005168.1 | 1.2628 | 0.3366     | 2,11E-06   | 0,00194716 | 9,56337   | 9,22673  | GAGTGTGG   | Homo sapiens Rho family GTPase 3 (RND3), mRNA.                                                                                                                                                                                    |            |
| U     | ILMN_172331SCGB2A2   | NM_002411.1 | 1.2585 | 0.3317     | 1,44E-06   | 0,0147016  | 6,68504   | 6,35319  | CTTCTCAAG  | Homo sapiens secretoglobin, family 2A, member 2 (SCGB2A2), mRNA.                                                                                                                                                                  |            |
| U     | ILMN_173961LRR6      | NM_012472.1 | 1.2558 | 0.3286     | 2,87E-06   | 0,0022252  | 7,4172    | 7,08861  | ACCAAGTAG  | Homo sapiens leucine rich repeat containing 6 (LRR6), mRNA.                                                                                                                                                                       |            |
| U     | ILMN_170171FIH3      | NM_0010316  | 1.2557 | 0.3285     | 1,15E-06   | 0,00130472 | 7,12618   | 6,79769  | GCCCAACTC  | Homo sapiens interferon-induced protein with tetratricopeptide repeats 3 (IFI3), mRNA.                                                                                                                                            |            |
| U     | ILMN_233651ACS2      | NM_0010765  | 1.2507 | 0.3227     | 2,32E-06   | 0,00204121 | 10,12928  | 9,80654  | TTTTCTTGC  | Homo sapiens acyl-CoA synthetase short-chain family member 2 (ACS2), transcript variant 2, mRNA.                                                                                                                                  |            |
| U     | ILMN_170871HZAF1     | NM_177925.1 | 1.2484 | 0.3201     | 1,59E-05   | 0,00878542 | 8,51795   | 8,13789  | GAGTAAAC   | Homo sapiens H2A histone family, member J (HZAF1), transcript variant 1, mRNA.                                                                                                                                                    |            |
| U     | ILMN_173201HIST2H2BE | NM_003528.1 | 1.2478 | 0.3194     | 2,69E-06   | 0,00216622 | 7,68282   | 7,36338  | CACTCAAC   | Homo sapiens histone cluster 2, H2be (HIST2H2BE), mRNA.                                                                                                                                                                           |            |
| U     | ILMN_168701LOC402251 | XM_377933.3 | 1.2432 | 0.314      | 0,00012491 | 0,0305754  | 10,02338  | 9,70938  | ATGATCATC  | PREDICTED: Homo sapiens similar to eukaryotic translation elongation factor 1 alpha 2 (LOC402251), mRNA.                                                                                                                          |            |
| U     | ILMN_173391DHR59     | NM_005771.1 | 1.2429 | 0.3137     | 5,69E-06   | 0,0039092  | 7,34776   | 7,03409  | GCCATTCAC  | Homo sapiens dehydrogenase/reductase (SDR family) member 9 (DHR59), transcript variant 1, mRNA.                                                                                                                                   |            |
| U     | ILMN_176841TCN1      | NM_001062.1 | 1.241  | 0.3115     | 3,31E-05   | 0,0139171  | 8,50398   | 8,19248  | TGAGTGGAG  | Homo sapiens transcobalamin I (vitamin B12 binding protein, R binder family) (TCN1), mRNA.                                                                                                                                        |            |
| U     | ILMN_174541IRF9      | NM_006084.1 | 1.241  | 0.3115     | 8,70E-05   | 0,0243836  | 8,8859    | 8,57435  | GTCCTGAT   | Homo sapiens interferon regulatory factor 9 (IRF9), mRNA.                                                                                                                                                                         |            |
| U     | ILMN_236781GEM       | NM_181702.1 | 1.2402 | 0.3106     | 2,07E-06   | 0,00194716 | 8,67133   | 8,36071  | CCCATGTGT  | Homo sapiens GTP binding protein overexpressed in skeletal muscle (GEM), transcript variant 2, mRNA.                                                                                                                              |            |
| U     | ILMN_169001TMEM156   | NM_002373.1 | 1.2338 | 0.3022     | 6,46E-06   | 0,00416206 | 7,16233   | 6,85917  | GCCAGACAT  | Homo sapiens histone cluster 2, H2af (HIST2H2AF), mRNA.                                                                                                                                                                           |            |
| U     | ILMN_181171GRN       | NM_002087.1 | 1.2338 | 0.3031     | 2,21E-05   | 0,0109415  | 8,43166   | 8,12858  | GCCCTCCCT  | Homo sapiens granulins (GRN), mRNA.                                                                                                                                                                                               |            |
| U     | ILMN_239941VAV3      | NM_006113.1 | 1.2337 | 0.303      | 8,07E-06   | 0,00503477 | 7,9274    | 7,62437  | CTTGTCTGT  | Homo sapiens vav 3 guanine nucleotide exchange factor (VAV3), transcript variant 1, mRNA.                                                                                                                                         |            |
| U     | ILMN_241321EWSR1     | NM_013986.1 | 1.2333 | 0.3025     | 0,00017593 | 0,0373841  | 8,19519   | 7,8927   | GCCGACCTT  | Homo sapiens Ewing sarcoma breakpoint region 1 (EWSR1), transcript variant EWS-b, mRNA.                                                                                                                                           |            |
| U     | ILMN_186201LOC731042 | XM_0011282  | 1.2318 | 0.3008     | 1,64E-05   | 0,00882486 | 7,73946   | 7,4387   | GCCGCTCAT  | PREDICTED: Homo sapiens hypothetical protein LOC731042 (LOC731042), mRNA.                                                                                                                                                         |            |
| U     | ILMN_174151ACS2      | NM_018677.1 | 1.2303 | 0.2987     | 5,48E-05   | 0,0173772  | 10,32299  | 10,02426 | CTTCCCTGC  | Homo sapiens acyl-CoA synthetase short-chain family member 2 (ACS2), transcript variant 1, mRNA.                                                                                                                                  |            |
| U     | ILMN_172421GRN       | NM_002087.1 | 1.2282 | 0.2892     | 3,48E-05   | 0,0141765  | 8,76984   | 8,48065  | AGGCTCGA   | Homo sapiens granulins (GRN), mRNA.                                                                                                                                                                                               |            |
| U     | ILMN_169111MT1A      | NM_005946.1 | 1.2209 | 0.288      | 0,00019458 | 0,0400028  | 12,01951  | 11,73156 | GTCCTCCT   | Homo sapiens metallothionein 1A (MT1A), mRNA.                                                                                                                                                                                     |            |
| U     | ILMN_169741TXNIP     | NM_006472.1 | 1.219  | 0.2857     | 9,93E-06   | 0,00600047 | 9,16034   | 8,87466  | CAGCATAG   | Homo sapiens thioredoxin interacting protein (TXNIP), mRNA.                                                                                                                                                                       |            |
| U     | ILMN_237481ATF3      | NM_0010406  | 1.2143 | 0.2802     | 1,99E-05   | 0,0104056  | 7,35882   | 7,07866  | CTCCAGCGT  | Homo sapiens activating transcription factor 3 (ATF3), transcript variant 4, mRNA.                                                                                                                                                |            |
| U     | ILMN_239321GK        | NM_203391.1 | 1.212  | 0.2774     | 0,00017882 | 0,0375853  | 8,31671   | 8,03951  | CGTAGGAG   | Homo sapiens glycerol kinase (GK), transcript variant 1, mRNA.                                                                                                                                                                    |            |
| U     | ILMN_205611TMEM156   | NM_002373.1 | 1.2107 | 0.2759     | 1,21E-05   | 0,0107996  | 8,21481   | 7,90259  | GCCAGACAT  | Homo sapiens histone cluster 2, H2af (HIST2H2AF), mRNA.                                                                                                                                                                           |            |
| U     | ILMN_177831PYGB      | NM_002862.1 | 1.2072 | 0.2716     | 4,60E-05   | 0,0156774  | 10,73274  | 10,46111 | GGAACAGC   | Homo sapiens phosphatase, brain (PYGB), mRNA.                                                                                                                                                                                     |            |
| U     | ILMN_229771KCNMA1    | NM_002247.1 | 1.2049 | 0.2689     | 2,54E-05   | 0,0168667  | 9,56331   | 9,29439  | GTTCTGCA   | Homo sapiens potassium large conductance calcium-activated channel, subfamily M, alpha member 1 (KCNMA1), transcript variant 2, mRNA.                                                                                             |            |
| U     | ILMN_173941FI27      | NM_001547.1 | 1.1929 | 0.2544     | 0,00012428 | 0,0305754  | 7,92207   | 7,66762  | GCTGACCA   | Homo sapiens interferon-induced protein with tetratricopeptide repeats 2 (IFI2), mRNA.                                                                                                                                            |            |
| U     | ILMN_171351NFC1      | NM_000271.1 | 1.1922 | 0.2536     | 0,00015628 | 0,0358498  | 10,01759  | 9,76399  | CTTGCAAC   | Homo sapiens Niemann-Pick disease, type C1 (NFC1), mRNA.                                                                                                                                                                          |            |
| U     | ILMN_17981EDEM1      | NM_014674.1 | 1.191  | 0.2521     | 5,46E-05   | 0,0173772  | 7,93749   | 7,68535  | AGTCTGGT   | Homo sapiens ER degradation enhancer, mannosidase alpha-like 1 (EDEM1), mRNA.                                                                                                                                                     |            |
| U     | ILMN_176891HIST2H2AC | NM_003517.1 | 1.1909 | 0.2521     | 8,47E-05   | 0,0167121  | 8,21818   | 7,91505  | GCCCAACTC  | Homo sapiens histone cluster 2, H2ac (HIST2H2AC), mRNA.                                                                                                                                                                           |            |
| U     | ILMN_177551MAGED1    | NM_0010053  | 1.1892 | 0.2499     | 3,08E-05   | 0,0135423  | 11,77157  | 11,52164 | CAGCATGTC  | Homo sapiens melanoma antigen family D, 1 (MAGED1), transcript variant 3, mRNA.                                                                                                                                                   |            |
| U     | ILMN_180121IFITM1    | NM_003641.1 | 1.1892 | 0.2499     | 0,0001698  | 0,0368924  | 7,60106   | 7,35111  | GCGTGTGC   | Homo sapiens interferon induced transmembrane protein 1 (9-27) (IFITM1), mRNA.                                                                                                                                                    |            |
| U     | ILMN_176851BHLH2     | NM_003670.1 | 1.1886 | 0.2492     | 2,96E-05   | 0,0133029  | 10,64359  | 10,39436 | GTCAGAG    | Homo sapiens basic helix-loop-helix domain containing, class B, 2 (BHLH2), mRNA.                                                                                                                                                  |            |
| U     | ILMN_206041CD24      | NM_013230.1 | 1.1876 | 0.248      | 3,71E-05   | 0,0141765  | 11,03986  | 10,79185 | TAGACTGC   | Homo sapiens CD24 molecule (CD24), mRNA.                                                                                                                                                                                          |            |
| U     | ILMN_18131428        | AF131794    | 1.1876 | 0.2435     | 4,62E-05   | 0,0156774  | 10,35334  | 10,0986  | TTCATATG   | Homo sapiens clone 25194 mRNA sequence                                                                                                                                                                                            |            |
| U     | ILMN_218181BEK2      | NM_002621.1 | 1.1832 | 0.2427     | 0,00016918 | 0,0368924  | 7,21495   | 6,97221  | AGGGAGAC   | Homo sapiens brain expressed X-linked 2 (BEK2), mRNA.                                                                                                                                                                             |            |
| U     | ILMN_167151PHLDA2    | NM_003311.1 | 1.1825 | 0.2418     | 8,21E-05   | 0,0243836  | 6,8747    | 6,44564  | TCCGGGCTC  | Homo sapiens pleckstrin homology-like domain, family A, member 2 (PHLDA2), mRNA.                                                                                                                                                  |            |
| U     | ILMN_165141HIST2H2BD | NM_138720.1 | 1.1821 | 0.2414     | 0,00012054 | 0,0305754  | 7,32314   | 7,08179  | TGGGATCC   | Homo sapiens histone cluster 1, H2bd (HIST2H2BD), transcript variant 2, mRNA.                                                                                                                                                     |            |
| U     | ILMN_177421CFB       | NM_001710.1 | 1.1815 | 0.2406     | 4,34E-05   | 0,0152886  | 6,83989   | 6,59928  | GTCCTATGC  | Homo sapiens complement factor B (CFB), mRNA.                                                                                                                                                                                     |            |
| U     | ILMN_213601MTE       | NM_175621.1 | 1.1801 | 0.239      | 0,0002352  | 0,0459391  | 7,91209   | 7,67913  | CGTGGGCT   | Homo sapiens metallothionein E (MTE), mRNA.                                                                                                                                                                                       |            |
| U     | ILMN_179471KRT2D     | NM_019010.1 | 1.1783 | 0.2367     | 0,00015341 | 0,0357417  | 6,66537   | 6,42849  | CCAGAGAG   | Homo sapiens keratin 20 (KRT20), mRNA.                                                                                                                                                                                            |            |
| U     | ILMN_168931SCD       | NM_005063.1 | 1.1773 | 0.2355     | 0,00013566 | 0,0323858  | 11,44546  | 11,20994 | TAGGAATGT  | Homo sapiens stearyl-CoA desaturase (delta-9-desaturase) (SCD), mRNA.                                                                                                                                                             |            |
| U     | ILMN_175311LOC124220 | NM_145252.1 | 1.1743 | 0.2319     | 5,34E-05   | 0,0173772  | 7,01837   | 6,78652  | TTGGGAGG   | Homo sapiens similar to common salivary protein 1 (LOC124220), mRNA.                                                                                                                                                              |            |
| U     | ILMN_211541RAB32     | NM_006834.1 | 1.1737 | 0.2311     | 6,47E-05   | 0,0201774  | 9,43966   | 9,20854  | CAGGTGGC   | Homo sapiens RAB32, member RAS oncogene family (RAB32), mRNA.                                                                                                                                                                     |            |
| U     | ILMN_212351TMED10P   | NR_002807.1 | 1.173  | 0.2302     | 0,00012701 | 0,0307005  | 10,39707  | 10,1669  | CCAAATCA   | Homo sapiens transmembrane emp24-like trafficking protein 10 (yeast) pseudogene (TMED10P), non-coding RNA.                                                                                                                        |            |
| U     | ILMN_235551PSP       | NM_002778.1 | 1.1724 | 0.2295     | 9,74E-05   | 0,0262137  | 11,2867   | 11,05717 | TCTGGTGC   | Homo sapiens prosaposin (PSP), transcript variant 1, mRNA.                                                                                                                                                                        |            |
| U     | ILMN_178861WBP2      | NM_012478.1 | 1.1718 | 0.2287     | 1,0E-05    | 0,0251399  | 10,89672  | 10,66652 | GCCCTAACA  | Homo sapiens WW domain binding protein 2 (WBP2), mRNA.                                                                                                                                                                            |            |
| U     | ILMN_175591ALDOC     | NM_005165.1 | 1.1673 | 0.2231     | 0,00011999 | 0,0288733  | 8,33449   | 8,11136  | CAATGATG   | Homo sapiens aldolase C, fructose-bisphosphate (ALDOC), mRNA.                                                                                                                                                                     |            |
| U     | ILMN_233721PKIB      | NM_032471.1 | 1.1673 | 0.2231     | 0,00020716 | 0,0412973  | 9,78699   | 9,56385  | CCGGGGAAT  | Homo sapiens protein kinase (cAMP-dependent, catalytic) inhibitor beta (PKIB), transcript variant 3, mRNA.                                                                                                                        |            |
| U     | ILMN_237571LOC642567 | NR_038054.1 | 1.1669 | 0.2227     | 0,00024504 | 0,0473839  | 7,50925   | 7,28656  | AGGGGAAT   | PREDICTED: Homo sapiens misc_RNA (LOC642567), miscRNA.                                                                                                                                                                            |            |
| U     | ILMN_1845037         | BC031266    | 1.1659 | 0.2215     | 0,00017433 | 0,0373841  | 7,43932   | 7,2178   |            |                                                                                                                                                                                                                                   |            |
